1                   **Measles virus exits human airway epithelia via infectious center sloughing**

2

3

4   Camilla E. Hippee<sup>1\*</sup>, Brajesh K. Singh<sup>1\*</sup>, Andrew L. Thurman<sup>2</sup>, Ashley L. Cooney<sup>1</sup>, Alejandro A.  
5   Pezzulo<sup>2</sup>, Roberto Cattaneo<sup>3</sup>, Patrick L. Sinn<sup>1†</sup>

6

7

8   <sup>1</sup>Stead Family Department of Pediatrics, Carver College of Medicine, The University of Iowa, Iowa  
9   City, IA, 52242, USA

10   <sup>2</sup>Department of Internal Medicine, Carver College of Medicine, The University of Iowa, Iowa City, IA,  
11   52242, USA

12   <sup>3</sup>Department of Molecular Medicine, Mayo Clinic, Rochester, MN, USA

13

14   \*C.E.H and B.K.S contributed equally to this work.

15

16   †Corresponding author: Patrick L. Sinn, Stead Family Department of Pediatrics, 169 Newton Rd, 6318  
17   PBDB, The University of Iowa, Iowa City, IA, 52242, USA, Tel: (319) 335-8190, Fax: 319-335-9412,  
18   Email: [patrick-sinn@uiowa.edu](mailto:patrick-sinn@uiowa.edu)

19

20   Short title: Measles virus exits the airways via infectious center sloughing

21

22   Key words: contagion; scRNA-seq; transmission; cell-associated virus; cell proliferation; apoptosis

23 **ABSTRACT**

24  
25 Measles virus (MeV) is the most contagious human virus, but we do not fully understand why. Unlike  
26 most respiratory viruses, MeV does not infect the airway epithelium immediately. MeV traverses the  
27 epithelium within immune cells that carry it to lymphatic organs where amplification occurs. Infected  
28 immune cells then synchronously deliver large amounts of virus to the airways. However, our  
29 understanding of MeV replication in airway epithelia is limited. To model it, we use well-differentiated  
30 primary cultures of human airway epithelial cells (HAE) from lung donors. In HAE, MeV spreads  
31 directly cell-to-cell forming infectious centers that grow for ~3-5 days, are stable for a few days, and  
32 then disappear. Transepithelial electrical resistance remains intact during the entire course of HAE  
33 infection, thus we hypothesized that MeV infectious centers may slough off while preserving epithelial  
34 function. After documenting by confocal microscopy that infectious centers progressively detach from  
35 HAE, we recovered apical washes and separated cell-associated from cell-free virus by centrifugation.  
36 Virus titers were about 10 times higher in the cell-associated fraction than in the supernatant. In  
37 sloughed infectious centers, ciliary beating persisted and apoptotic markers were not readily detected,  
38 suggesting that they retain functional metabolism. Cell-associated MeV infected primary human  
39 monocyte-derived macrophages, modeling the first stage of infection in a new host. Single-cell RNA  
40 sequencing identified wound healing, cell growth, and cell differentiation as biological processes  
41 relevant for infectious center sloughing. 5-ethynyl-2'-deoxyuridine (EdU) staining located proliferating  
42 cells underneath infectious centers. Thus, cells located below infectious centers divide and  
43 differentiate to repair the extruded infected epithelial patch. As an extension of these studies, we  
44 postulate that expulsion of infectious centers through coughing and sneezing could contribute to  
45 MeV's strikingly high reproductive number by allowing the virus to survive longer in the environment  
46 and by delivering a high infectious dose to the next host.

47

48

49 **AUTHOR SUMMARY**

50 Measles virus (MeV) is a respiratory pathogen that infects millions worldwide each year. Although  
51 sometimes mischaracterized as an innocuous childhood disease, measles remains a leading cause of  
52 death for children under five. MeV is the most contagious human virus and requires vaccination rates  
53 above 90% to maintain herd immunity. Global decreases in vaccination rates over the past ten years  
54 contributed to recent, widespread MeV outbreaks. We uncover here a novel mechanism by which  
55 MeV exits the human airways that may explain why it is much more contagious than other viruses. We  
56 document that infected cells containing cell-associated virus slough *en masse* from the airway  
57 epithelial sheet. These expelled infectious centers are metabolically active and can transmit infection  
58 to primary human monocyte-derived macrophages more efficiently than cell-free virus particles. Thus,  
59 cell-associated MeV can transmit host-to-host, a new paradigm for efficient respiratory virus  
60 transmission.

61

62

63

## 64 INTRODUCTION

65 Despite the development of an effective vaccine for measles virus (MeV), measles persists in  
66 populations that have limited access to healthcare and is reemerging in populations that refuse  
67 vaccinations. MeV outbreaks were extensive in 2019, with 1,282 confirmed cases in the United States  
68 and more than 500,000 confirmed cases worldwide [1]. MeV is of particular concern because of its  
69 high transmission potential, measured by the basic reproduction number ( $R_0$ ). MeV has an estimated  
70  $R_0$  value between 12 and 18, which suggests vaccination rates should exceed 92% to protect a  
71 community via herd immunity [2-4]. Cases of MeV are projected to rise due to postponed measles  
72 vaccination campaigns as healthcare infrastructures focus on COVID-19 cases [5].

73 The MeV replication cycle is fundamentally different from that of other respiratory viruses [6-8].  
74 MeV enters the body through the upper airways and infects alveolar macrophages and dendritic cells  
75 that express its primary receptor, the signaling lymphocytic activation molecule (SLAM) [9]. These  
76 cells ferry the infection through the epithelial barrier and spread it to the local lymph nodes [10, 11].  
77 Amplification of MeV in immune tissues sets the stage for synchronous, massive invasion of tissues  
78 expressing the MeV epithelial receptor, nectin-4 [12, 13]. This two-phase process contributes to the  
79 extremely contagious nature of MeV [14-19].

80 However, knowledge of the respiratory phase of MeV infection is limited. To model it, we use well-  
81 differentiated primary cultures of human airway epithelial cells (HAE) that are maintained at an air-  
82 liquid interface. Contrary to initial assumptions, we demonstrated that MeV enters HAE from the  
83 basolateral side, delivered by infected immune cells [20, 21]. MeV infection of HAE is minimally  
84 cytopathic. Epithelial integrity, as monitored by transepithelial electrical resistance, remains intact for  
85 weeks after inoculation; in addition, infected cells retain their columnar structure and lateral  
86 cytoskeletal interactions without forming visible syncytia [22]. Using a recombinant MeV expressing  
87 green fluorescent protein (GFP), we observed that cytosolic GFP rapidly flows from infected into  
88 adjacent cells. These results suggest the formation of pores along the lateral membrane of columnar  
89 epithelial cells and provide a route for direct cell-to-cell spread [22]. Furthermore, using a MeV  
90 expressing GFP linked to a component of its ribonucleocapsids (RNP), we observed movement of

91 RNPs along the circumapical F-actin rings of newly infected cells, a strikingly rapid mechanism of  
92 horizontal trafficking between epithelial cells [23].

93 In spite of efficient spread between respiratory epithelial cells, apical budding is inefficient: MeV  
94 titers in apical washes *in vitro* and in bronchial alveolar lavages of macaques *in vivo* are lower than  
95 those of other respiratory viruses [11, 21, 24, 25]. On the other hand, recent studies of MeV spread  
96 suggest that cell-associated virus may have a significant role in host-to-host transmission.

97 Specifically, respiratory droplets with the highest viral titers were recovered during intervals when a  
98 patient was coughing most frequently [26]. An association between coughing and high viral titer  
99 secretions was also observed in experimentally infected macaques [25]. A closer look at these  
100 secretions revealed that MeV-infected cells containing cell-associated virus were expelled during  
101 coughing and the titers of cell-associated and cell-free virus within the secretions were similar.

102 In this study, we investigated how infectious MeV is released from HAE. We present evidence  
103 suggesting that sloughing of metabolically active infectious centers contributes to MeV's strikingly high  
104 reproductive number.

105

## 106 **RESULTS**

### 107 **Infectious centers dislodge from HAE as units**

108 Using a MeV that expresses green fluorescent protein (MeV-GFP), we infected HAE (MOI = 1)  
109 from the basolateral surface and live-imaged infectious centers at low power over a period of 3 weeks  
110 (**Fig 1A**). During the first ~5 days of infection, MeV spreads to surrounding cells, causing the  
111 infectious centers to grow in size. Around 7-10 days post-infection, infectious centers often  
112 “disappear” from the epithelial sheet. To understand their fate, we performed confocal microscopy at  
113 an early time point, day 3 (**Fig 1B and Movie S1**), and a late time point, day 21 (**Fig 1C and Movie**  
114 **S2**). In contrast to day 3, at day 21 the infectious center was dislodging from the epithelial layer. The  
115 cells of the infectious center remained clustered while detaching from uninfected epithelia, causing the  
116 infectious center to shed as a unit, as shown in the 3D reconstruction models (**Figs 1D, 1E, and S1**).

### 117 **Sloughed infectious centers contain most released infectivity**

118 To investigate the relevance of infectious center sloughing for virus transmission, we sought to  
119 quantify virus load in infected HAE cultures. We collected apical washes, cell lysates, and basolateral  
120 media from infected HAE every 3-4 days for 21 days post-infection. Apical washes were gently  
121 centrifuged in order to separate cell-free virus in the supernatant from cell-associated virus in the  
122 pellet (**Fig 2A**). We then measured virus titer in cell lysates, basolateral media, and cell-free and cell-  
123 associated virus from apical media (**Fig 2B**). High titers were observed in the cell lysates starting at 7  
124 days post-inoculation, consistent with microscopy observations. In apical washes, virus titers were  
125 very low through day 10 post-inoculation. Starting from day 14, cell-associated virus titers were at  
126 least 10-fold higher than cell-free virus titers. These results indicate that most infectious MeV remains  
127 cell associated and exits the epithelial sheet via cell sloughing.

### 128 **Sloughed infectious centers remain viable**

129 Infectious centers were collected in the apical washing to assess the viability after sloughing.  
130 Immunostaining and confocal microscopy imaging revealed intact nuclei and the F-actin cytoskeleton

131 **(Fig 2C)**. Strikingly, ciliary beating persisted in some sloughed infectious centers (**Movie S3**), which  
132 requires active metabolism [27].

133 To assess the extent to which viability is preserved in sloughed infectious centers, we used  
134 immunostaining to measure cleaved caspase-3, an apoptosis marker. Sloughed infectious centers  
135 were negative for caspase-3 staining (**Fig 3A**); whereas, HAE treated with a positive control, protein  
136 kinase inhibitor staurosporine, were caspase-3 positive (**Fig 3B**). Western blotting confirmed that  
137 cleaved caspase-3 is not found in the lysates of mock or MeV-infected HAE over 14 days (**Fig 3C**). As  
138 an additional control, we used respiratory syncytial virus (RSV), another Paramyxovirus that induces  
139 apoptosis and apical cell sloughing in the bronchus of infants [28]. Caspase-3 and caspase-7 activity  
140 was significantly higher in RSV-infected HAE than in mock-infected HAE (**Fig 3D**), but these activities  
141 remained at background level in MeV-infected HAE. Altogether, these results indicate that the cells  
142 within MeV infectious centers remain viability after dislodging from the epithelial sheet.

#### 143 **Sloughed infectious centers spread MeV infection to primary macrophages**

144 We next asked if sloughed infectious centers infect macrophages, one of the cell types that ferry  
145 virus from the lumen of the airways to the lymphatic organs. To generate macrophages, we isolated  
146 monocytes from donated human blood and treated them with the appropriate cytokines to stimulate  
147 their differentiation into M2 macrophages (**Fig 4A**). We then co-cultured these M2 macrophages with  
148 extruded infectious centers collected from an apical wash of MeV-infected HAE 14 days post-  
149 inoculation. As a comparison, we used cell-free virus collected in parallel. Two days later,  
150 macrophages were examined for signs of infection using microscopy (**Fig 4B**). Cell-associated virus  
151 (green arrow) spread MeV to nearby macrophages (red arrows); cell-free MeV also infected  
152 macrophages, but its lower titers limited the effective MOI. When the number of infected macrophages  
153 were quantified by visual counting and normalized to the input titer determined post-hoc, we observed  
154 similar levels of infectivity between cell-associated and cell-free MeV (**Fig 4C**). These experiments  
155 suggest that when normalized to input PFU, infectious centers are as effective as cell-free virus in  
156 delivering MeV to macrophages. However, since most virus remains cell-associated, sloughed

157 infectious centers may be the primary infection spreader. We next sought to better understand the  
158 mechanism of infectious center release from the epithelial sheet.

### 159 **Defining the transcriptome of MeV infected HAE**

160 To better understand the cellular response to MeV infection, we performed single-cell RNA-seq  
161 (scRNA-seq) on infected HAE cultures at 3, 7, and 14 days post-inoculation, and as control, mock-  
162 infected HAE at days 3 and 14 (**Fig 5A**). Each condition included cultures from 10 pooled matched  
163 human donors; similar numbers of cells were sequenced and subjected to equally powered  
164 bioinformatic analyses. In total, RNAs from 30,743 cells were sequenced via 10x Genomics scRNA-  
165 seq.

166 Results were visualized in a uniform manifold approximation and projection (UMAP), where cells  
167 with similar gene expression profiles cluster (**Figs 5B, 5C, and S2A**). Similar profile distributions were  
168 observed for GFP+, GFP-, and mock-infected cells (**Fig 5B**). Using expression profiles of marker  
169 genes (**Fig S2B**), we defined 8 individual clusters (**Fig 5C**), four of them representing the main HAE  
170 cell types: secretory, basal, ciliated, and the rare (<1%) pulmonary neuroendocrine cells (PNECs).  
171 The four additional clusters were defined by a combination of cell type and phenotypic markers:  
172 interferon-high, low unique molecular identifier (UMI), mitotic basal, and mitotic surface.

173 HAE are typically mitotically quiescent. However, we identified two small, but distinct clusters of  
174 dividing cells, mitotic basal and mitotic surface. These clusters are primarily composed of both GFP+  
175 and GFP- cells from the day 14 timepoint in infected cultures and are almost absent in mock-infected  
176 cells (**Figs 5C and S2A**). Consistent with microscopic evidence showing that basal cells are non-  
177 permissive to MeV infection, GFP+ basal cells were uncommon (**Fig 5D**). Of note, the cell type  
178 specificity of interferon-high cells could not be determined, but these cells were predominately GFP+  
179 (**Fig 5C, D**).

180 We also compared the levels of viral RNAs (vRNAs) for each cell type in infected (GFP+ and  
181 GFP- combined) and mock-infected cultures over time (**Fig S2C**). Consistent with earlier  
182 observations, vRNA was consistently low in non-dividing basal cells. New observations included the



183 existence of increasing vRNA levels in mitotic basal cells, and high levels of vRNA expression in the  
184 newly defined interferon-high cluster at 14 days post-infection.

### 185 **Candidate gene expression pathways involved in infectious center sloughing**

186 To identify enriched or reduced biological processes resulting from MeV infection, we performed  
187 unbiased signal pathway analysis. As a comparison between the GFP+, GFP-, and Mock groups, lists  
188 of differentially expressed genes were generated with a threshold adjusted p-value of 0.05. For GFP+  
189 cells, we identified 91 upregulated genes and 83 downregulated genes; for GFP- cells, 66 upregulated  
190 genes and 34 downregulated genes were identified (**Supplemental Table 1**).

191 A gene ontology analysis tool, GenCLiP 2.0, was then used to identify gene expression pathways  
192 activated or repressed during infectious center sloughing [29, 30]. Interferon and inflammation related  
193 pathways were more upregulated in GFP+ cells as compared to GFP- cells (**Fig 6A, B**). Of note,  
194 apoptosis pathways were downregulated in GFP+ cells (**Fig 6 A, C**), consistent with our earlier  
195 observations (**Fig 3**). In addition, pathways associated with wound healing, cell growth, and cell  
196 differentiation were upregulated in GFP- cells as compared to GFP+ cells (**Fig 6 A, B**). Cell  
197 proliferation genes were upregulated in GFP- cells as compared to GFP+ cells throughout the course  
198 of infection (**Fig 6D**). Altogether, these results indicate that GFP+ cells inhibit apoptotic pathways as  
199 innate immune responses develop. In contrast, GFP- cells begin to differentiate. This suggested to us  
200 that basal cells situated underneath infectious centers may divide, possibly in preparation for taking  
201 over the epithelium-sealing function of the sloughing infected patch.

### 202 **Basal cells underneath infectious centers proliferate**

203 After confirming that baseline transepithelial electrical resistance remained constant following  
204 MeV-GFP infection of HAE (**Fig 7A**), we asked whether cells situated underneath infectious centers  
205 proliferate. To identify dividing cells, we used the DNA synthesis marker 5-ethynyl-2'-deoxyuridine  
206 (EdU). Indeed, EdU+ cells were localized with infectious centers (**Fig 7B, C**). We then quantified the  
207 kinetics of cell division induction below infectious centers. At day 3 post-inoculation, few EdU+ cells  
208 were detected in association with infectious centers, but the number of EdU+ cells continuously

209 increased with time (**Fig 7D**). Consistent with this observation, the scRNA-seq dataset indicated an  
210 increase of mitotic basal cells over time (**Fig 7E**). A control EdU+ cell count that excluded infectious  
211 centers confirmed the quiescent state of cells not located below infectious centers (**Fig 7F, G**). These  
212 data show that basal cell proliferation is associated with infectious center formation in HAE. Such  
213 proliferation may protect the integrity of the epithelium as infectious centers passively slough or  
214 actively dislodge the infectious center from the epithelial sheet.

215

216

217

## 218 **DISCUSSION**

219 We demonstrate that MeV exits the epithelial sheet via dislodging of infectious centers. We also  
220 show that sloughed infectious centers can transmit infection to human macrophages, one of the cell  
221 types that carries infectivity from the lumen of a new host's airways to its lymphatic organs. Since  
222 extruded infectious centers contain the most released virus, they may have a central role in host-to-  
223 host transmission. Our results also indicate that little cell-free virus is released from HAE, which  
224 challenges the idea that apical budding is the major pathway by which MeV exits the airways [31-34].

225 Infectious center sloughing is consistent with published *in vivo* observations. The presence of  
226 exfoliated giant epithelial cells in swab samples from patients is a diagnostic feature of measles [35,  
227 36]. Giant cells can be detected in nasopharyngeal mucus from the start of the measles rash, and the  
228 duration of their excretion correlates with severity of acute disease [36]. In bronchial alveolar lavages  
229 from experimentally infected macaques, Ludlow et al. documented high numbers of MeV-infected  
230 cells or cell debris "spilling" from epithelia into the respiratory tract [25]. These authors also measured  
231 equivalent titers of expelled cell-free and cell-associated virus released into the airways and attributed  
232 the presence of cells in the airways to stimulation of the cough response. Our data show that  
233 coughing is not required to release infected cells. Consistent with *in vivo* observations [25], infectious  
234 center sloughing may promote coughing and sneezing that contributes to the infectious nature of  
235 MeV. Although the primary spread of MeV appears to be through aerosols and respiratory droplets,  
236 fomites coated with sloughed infectious centers could also be a significant contributor in viral  
237 transmission [18, 26, 37, 38].

238 MeV is the most contagious human virus [2-4]. However, the limited currently available  
239 transmission studies do not explain why MeV is so much more transmissible than other respiratory  
240 viruses. In fact, experimentally infected non-human primates exhibit low MeV titers in bronchial lavage  
241 fluid as compared to other respiratory viruses [11, 24, 25]. We think that metabolically active MeV  
242 infectious centers could survive in the environment longer than viral particles, and that sloughing of  
243 infectious centers accounts in part for the MeV's high basic reproduction number. Examples of  
244 increased viral stability achieved through packaging include the encapsulation of enteroviruses in

245 vesicles, and baculovirus ocular bodies that are more resistant to heat, desiccation, radiation, and  
246 chlorine treatment when compared to free virus [39-41]. Vesicle-cloaked rotaviruses are more  
247 infectious than free virions, and it is postulated that virions enclosed in vesicles are protected from  
248 degradation by intestinal proteases and/or bile acids [41]. Enteric hepatitis A virus (HAV) membrane-  
249 encapsulated virions provide protection against neutralizing antibodies that result in enhanced spread  
250 within a host [42]. Another advantage of virus delivery through infectious centers is high titer “*en bloc*”  
251 transmission of multiple genomes, which may be required for rapid MeV dissemination in its two  
252 ecological niches [43, 44]. Further experiments are required to confirm the survival benefits of MeV  
253 remaining cell-associated in the environment.

254 While apoptosis induces cell sloughing for other respiratory viruses [28, 45, 46], our scRNA-seq  
255 data, lack of detection of activated caspases, and the documentation of ciliary beating in sloughed  
256 infectious centers indicate that MeV can effectively control apoptosis of well-differentiated HAE.  
257 Based on insights from gene ontology analyses, future studies will focus on genes controlling wound  
258 healing pathways and cell adhesion processes as potential regulators of the sloughing mechanisms.

259 MeV may take advantage of the host response to actively extrude cells that pose a risk to the  
260 integrity to the epithelial sheet. Indeed, live cell extrusion from epithelial sheets can result from  
261 multiple stimuli, such as overcrowding, tumor suppression, or invasion by pathogens [47-50]. Our  
262 results show that basal cell proliferation occurs directly underneath infectious centers. Cell  
263 proliferation may reflect the host’s response to replace sloughing or damaged cells, promoting  
264 extrusion by “pushing” infectious centers off the epithelial layer. We observed by microscopy, and  
265 confirmed though scRNA-seq, that basal cells are rarely infected by MeV. Since basal cells are the  
266 primary proliferative cell type in differentiated epithelia, this could explain how the epithelia can  
267 maintain integrity for at least 21 days. The relative expression of nectin-4, the epithelial cellular  
268 receptor for MeV [12, 13], in basal cells could account, in part, for their nonpermissivity to MeV  
269 infection; however, additional studies are required to determine how basal cells are resistant to MeV.

270 We acknowledge that this study has limitations. First, all experiments were performed *in vitro*.  
271 Unpassaged primary HAE cultures recapitulate the *in vivo* airway surface epithelium in cell type

272 distribution and morphology. However, they do not contain immune cells which contribute to clearing  
273 infections from the airways and may impact infectious center growth and/or sloughing. Second, the  
274 single cell sequencing experiments necessitated sorting to enrich for MeV infected (ie, GFP+) cells  
275 and ensure adequate sampling. As a result, we are aware that cell sorting may have skewed our  
276 samples toward cell types that are more easily disassociated into single cell populations. Finally,  
277 experiments with HAE do not allow us to test the efficacy of host-to-host spread of cell-associated  
278 MeV. To address these limitations, future research should include *in vivo* non-human primate studies.

279         In summary, our results document that MeV uses a novel mechanism of infectious center  
280 dislodging to exit airway epithelia. Cell-associated MeV in sloughed infectious centers may be  
281 protected from environmental stressors that promote virion degradation during inter-host transmission.  
282 Active expelling of infectious centers into the environment may contribute to the exceptionally high  
283 transmission efficiency of MeV.

284

285

286

287 **MATERIALS AND METHODS**

288 **Ethical statement.** The well-differentiated primary cultures of human airway epithelia (HAE) in this  
289 study were provided by the University of Iowa *In Vitro* Models and Cell Culture Core using discarded  
290 tissue, autopsy, or surgical specimens. No identifiable information was provided and all human  
291 subject studies were conducted with approval from the University of Iowa Institutional Review Board.

292

293 **Human airway epithelial cells.** The University of Iowa *In Vitro* Models and Cell Culture Core cultured  
294 and maintained HAE as previously described [51]. Briefly, following enzymatic disassociation of  
295 trachea and bronchus epithelia, the cells were seeded onto collagen-coated, polycarbonate transwell  
296 inserts (0.4  $\mu\text{m}$  pore size; surface area = 0.33  $\text{cm}^2$ ; Corning Costar, Cambridge, MA). HAE were  
297 submerged in Ultraser G (USG) medium for 24 hours (37°C and 5%  $\text{CO}_2$ ) at which point the apical  
298 media is removed to encourage polarization and differentiation at an air-liquid interface. The HAE  
299 used in these experiments were at least 3 weeks old with a transepithelial electrical resistance > 500  
300  $\Omega \cdot \mu\text{m}^2$ .

301

302 **Measles virus production.** The MeV-GFP virus used in these experiments is a recombinant MeV  
303 derived from the wild-type IC-323 strain. The generation and use of this virus have been previously  
304 published [7]. Briefly, Vero-hSLAMF1 cells [52] stably express the human measles receptor SLAMF1  
305 and were cultured in Dulbecco modified Eagle medium (DMEM; Thermo Fisher Scientific) containing  
306 5% newborn calf serum (NCS; Thermo Fisher Scientific) and penicillin-streptomycin (100 mg/mL;  
307 Thermo Fisher Scientific). After infection with MeV-GFP, the virus is allowed to propagate for 2-3 days  
308 at which point the cells are lysed via three freeze/thaw cycles to release the virus. TCID<sub>50</sub> titers (with  
309 Vero-hSLAMF1 cells) are used to determine the titer of MeV-GFP. The titer of MeV-GFP used in  
310 these experiments was  $\sim 10^7$  TCID<sub>50</sub>/mL.

311

312 **Infection of HAE.** Infection of HAE in these experiments was performed as previously described [21,  
313 22]. Briefly, because MeV enters HAE basolaterally, HAE cultures are inverted and covered with a 50

314  $\mu\text{L}$  mixture of serum-free medium and MeV-GFP. HAE are incubated for 2-4 hours at  $37^\circ\text{C}$  and 5%  
315  $\text{CO}_2$  before the inoculum is removed and the cultures are returned upright. RSV infections were  
316 accomplished by delivering a  $100 \mu\text{L}$  mixture of serum-free medium and RSV-GFP to the apical side  
317 of HAE. After 2 hours of incubation at  $37^\circ\text{C}$  and 5%  $\text{CO}_2$ , the inoculum was removed and the HAE  
318 were washed with serum-free medium three times.

319

320 **Separation of cell-free and cell-associated virus.**  $100 \mu\text{l}$  of USG medium was applied apically to  
321 each transwell of MeV-infected HAE. After 5 minutes of incubation ( $37^\circ\text{C}$  and 5%  $\text{CO}_2$ ), the medium  
322 was gently pipetted up and down two times before collection. Washes were then centrifuged for 3  
323 minutes at  $200 \times g$ . The supernatant, containing cell-free virus, was then transferred to a new tube.  
324 The pellet, containing cell-associated virus, was resuspended in  $100 \mu\text{l}$  of USG medium.

325

326 **Caspase-3 activity assay.** MeV-infected, RSV-infected, staurosporine-treated, or mock-infected HAE  
327 were assayed for caspase-3 activity using the EnzChek Caspase-3 Assay Kit #1, Z-DEVD-AMC  
328 substrate (catalog no. E13183, Invitrogen) in black, clear bottom 96-well assay plates (catalog no.  
329 3603, Corning Costar). Cells were treated apically with  $100 \mu\text{M}$  staurosporine (catalog no. ab120056;  
330 Abcam, Cambridge MA) in PBS for 5 hours. Treatment was removed, cells were washed with PBS,  
331 and were immediately fixed or assayed. Fluorescence was measured via a SpectraMax i3x Multi-  
332 Mode Microplate Reader (Molecular Devices; San Jose, CA).

333

334 **Immunostaining and microscopy.** Cells were prepared for immunostaining and confocal  
335 microscopy by fixation in 2% paraformaldehyde for 15 minutes, permeabilization in 0.2% Triton X-100  
336 for 1 hour, and blocking in SuperBlock Blocking Buffer (Thermo Fisher Scientific, Waltham, MA).  
337 Cleaved caspase-3 was immunostained by incubating HAE with a primary human cleaved caspase-3  
338 (Asp175) antibody (catalog no. MAB835; R&D Systems, Minneapolis, MN, 1:100 in SuperBlock  
339 Blocking Buffer) for 1 hour. This was followed up with a 1-hour incubation of an Alexa 568 labeled

340 anti-rabbit secondary antibody (catalog no. A-11036; Invitrogen, Waltham, MA, 1:1000 in SuperBlock  
341 Blocking Buffer). To stain for F-actin, HAE were incubated with Phalloidin-Alexa 647 (1:50 in PBS,  
342 catalog no. A22287; Thermo Fisher Scientific) for 30 minutes. The filters with the HAE were then cut  
343 from the rest of the transwell insert and mounted on glass microscope slides using VECTASHIELD  
344 Mounting Medium with DAPI (catalog no. H-1200-10; Vector Laboratories, Inc., Burlingame, CA).  
345 Confocal images were acquired using a Leica TCS SP3 confocal microscope (Leica Microsystems,  
346 Inc.) with 20x, 40x, and 63x objectives. Images were processed and z-stacks were compiled using  
347 ImageJ version 2.1.0. Live-image microscopy was performed using a Leica DMI6000-B inverted  
348 microscope (Leica Microsystems, Inc., Buffalo Grove, IL) using a 10x objective.

349

350 **EdU staining.** 10  $\mu$ M 5-Ethynyl-2'-deoxyuridine (EdU) was added to the basolateral media of HAE for  
351 16 hours. HAE were fixed with 2% paraformaldehyde for 15 minutes. HAE were blocked and  
352 permeabilized with 3% BSA in PBS and 0.2% Triton X-100 in PBS. The Click-iT EdU Cell Proliferation  
353 Kit (Alexa Fluor 594, Thermo Fisher Scientific) was used to detect EdU+ cells. The HAE were washed  
354 and mounted on glass slides with VECTASHIELD Mounting Medium with DAPI. Images were taken  
355 using confocal microscope and a 40x objective.

356

357 **Isolation of primary human monocyte-derived macrophages.** Peripheral blood mononuclear cells  
358 (PBMCs) were isolated from healthy human donors by performing a Ficoll-Paque gradient (Thermo  
359 Fisher) on whole blood. The PBMCs were then cultured in RPMI 1640 medium (supplemented with  
360 10% fetal bovine serum, 5% penicillin/streptomycin, and 1x non-essential amino acid) and 50 ng/mL  
361 of human macrophage colony-stimulating factor (M-CSF, Millipore, Temecula, CA) for 5-6 days at  
362 37°C and 5% CO<sub>2</sub>. The cells were then stimulated with 20 ng/mL of recombinant human IL-4 (Gibco)  
363 and 20 ng/mL of recombinant human IL-13 (Sigma-Aldrich, St. Louis, MO) to promote differentiation  
364 into M2 macrophages. The cells are considered fully differentiated upon observation of a change in  
365 morphology (~7 days post-collection). For the infection experiments, M2 monocyte-derived  
366 macrophages were plated on 96-well plates (catalog no. 3596, Corning Costar) at a density of 20,000



367 cells/well. Cell-free and cell-associated virus were collected as described above. A portion of each  
368 collection was set aside for TCID<sub>50</sub> titers. 50 µL of either cell-free or cell-associated virus was applied  
369 to each well of macrophages. TCID<sub>50</sub> titer results were used to back-calculate the amount of infectious  
370 material applied per well.

371

372 **Fluorescence-activated cell sorting (FACS).** Mock and MeV-infected HAE (MOI = 5) were prepared  
373 for FACS at 3, 7, and 14 days post-infection. HAE were dissociated by incubation with TrypLE (Gibco)  
374 for 30 minutes at 37°C and 5% CO<sub>2</sub>. Dissociated cells were collected and centrifuged at 200 x g for 5  
375 minutes. The TrypLE was aspirated, the cells were resuspended in DMEM/F-12 media (Gibco) and  
376 kept on ice (~4°C). FACS was performed on a BD FACSAria Fusion (BD Biosciences, San Jose, CA)  
377 by the University of Iowa Flow Cytometry Core.

378

379 **Single-cell RNA sequencing (scRNA-seq).** We generated single-cell RNA sequencing libraries  
380 using the Chromium Single Cell Gene Expression v3 kit (10X Genomics, Pleasanton, CA). Briefly,  
381 ~5,000 cells from each sample were loaded into a Chromium Next GEM Chip with Gel Beads and  
382 Master Mix where they were partitioned in oil to form gel beads in emulsion (GEMs). The GEMs were  
383 then barcoded with an Illumina TruSeq sequencing primer, barcode, and unique molecular identifier  
384 (UMI). The samples then undergo reverse transcription, cDNA amplification, enzymatic fragmentation,  
385 End Repair, A-tailing, Adaptor Ligation, and PCR to finalize the library preparation. The samples were  
386 then sequenced by the Genomics Division of the Iowa Institute of Human Genetics using the  
387 NovaSeq 6000.

388

389 **Bioinformatic analyses.** Raw sequencing reads were processed using CellRanger version 3.0.2.  
390 Reads were aligned to a hybrid genome consisting of human genome reference GRCh38.p13 and  
391 MeV-GFP. Loupe Browser v4.1.0 was used to visualize cells and generate lists of differentially  
392 expressed genes. GenClip2.0 was used to identify candidate pathways in a gene ontology analysis.  
393 For analysis of gene expression at single cell resolution, gene-by-cell count matrices for each sample

394 were merged and analyzed with the R package Seurat version 3.1.1 [53, 54]. Counts for each cell  
395 were normalized by total UMIs and log transformed to quantify gene expression. Centered and scaled  
396 gene expression for the 2,000 mostly highly variable genes were reduced to the first 12 principal  
397 component scores for input to a shared nearest neighbor clustering algorithm. Cell types were  
398 identified by testing for highly upregulated genes in each cluster using a Wilcoxon rank sum test and  
399 associating upregulated genes with a list of known airway epithelial markers.

400

401 **Western blot.** Mock or MeV-infected HAE were lysed using RIPA Lysis and Extraction Buffer  
402 (Thermo Fisher Scientific) with complete mini EDTA-free protease inhibitors (Roche, Mannheim,  
403 Germany). Protein concentration was determined via the Pierce BCA Protein Assay Kit (Thermo  
404 Fisher Scientific). Samples were boiled at 95°C for 5 minutes with Laemmli buffer and 20 µg of each  
405 was loaded into a 4-20% Mini-PROTEAN TGX Precast Protein Gel (BioRad, Hercules, CA). Gels  
406 were run at 100 V for 30-60 minutes and then transferred to PVDF membranes for 2 hours at 250 mV.  
407 Blots were blocked with 5% milk in 1x TBS-T buffer for 1 hour. Primary antibodies for cleaved  
408 caspase-3 (catalog no. MAB835; R&D Systems) and polyclonal rabbit anti-N<sub>505</sub> [55] were used at a  
409 concentration of 1:800 and 1:1000 respectively. Horseradish peroxidase (HRP)-conjugated goat anti-  
410 rabbit IgG(H+L) (catalog no. 111-035-144, Millipore) was used as a secondary at 1:10,000. Blots were  
411 developed with SuperSignal West Pico PLUS Chemiluminescent Substrate (Thermo Fisher Scientific).

412

413 **Statistics.** Unless otherwise indicated, all numerical data presented in bar graphs are shown as the  
414 mean ± SE. Statistical analyses were performed using GraphPad Prism software. Two tailed,  
415 unpaired Student's t tests or one-way ANOVA with Tukey's correction for multiple comparisons  
416 assuming equal variance were used to compare experimental groups. p values <0.05 were  
417 considered statistically significant (\*p < 0.05, \*\*\*\*p < 0.0001).

418

419

420 **ACKNOWLEDGEMENTS**

421 We thank Steven Varga for providing the RSV-GFP. We thank Jennifer Bartlett and Miguel Ortiz  
422 Bezara for their critical reading of the manuscript and Ni Li and Guillermo Romano Ibarra for technical  
423 help. We acknowledge the support of the University of Iowa Flow Cytometry Core, the Genomics  
424 Division of the Iowa Institute of Human Genetics, and the In Vitro Models and Cell Culture Core. This  
425 work was supported by the National Institutes of Health R01 AI-132402 (PLS), R01 AI-143791 (RC),  
426 and the Cystic Fibrosis Foundation University of Iowa RDP Bioinformatics Core (AAP).

427

428 **Author Contributions:** Conceptualization, C.E.H., B.K.S., P.L.S.; data curation, C.E.H, B.K.S., A.L.C,  
429 A.L.T.; formal analysis, C.E.H., B.K.S., A.L.T.; funding acquisition, A.A.P., R.C., P.L.S.; investigation,  
430 C.E.H., B.K.S., A.L.T., A.L.C.; visualization, C.E.H., B.K.S., A.L.T., P.L.S.; writing – original draft  
431 preparation, C.E.H., B.K.S.; writing – review & editing, C.E.H., B.K.S., A.L.T., A.L.C., A.A.P., R.C.,  
432 P.L.S.

433

434

435 **REFERENCES**

- 436 1. WHO. Measles [cited 2021 4 January]. Available from: [https://www.who.int/news-room/fact-](https://www.who.int/news-room/fact-sheets/detail/measles)  
437 [sheets/detail/measles](https://www.who.int/news-room/fact-sheets/detail/measles).
- 438 2. Anderson RM, May RM. Directly transmitted infections diseases: control by vaccination.  
439 Science. 1982;215(4536):1053-60.
- 440 3. Anderson RM, May RM. Age-related changes in the rate of disease transmission: implications  
441 for the design of vaccination programmes. J Hyg (Lond). 1985;94(3):365-436.
- 442 4. Guerra FM, Bolotin S, Lim G, Heffernan J, Deeks SL, Li Y, et al. The basic reproduction  
443 number (R0) of measles: a systematic review. Lancet Infect Dis. 2017;17(12):e420-e8.
- 444 5. Roberts L. Why measles deaths are surging - and coronavirus could make it worse. Nature.  
445 2020;580(7804):446-7.
- 446 6. Leonard VH, Hodge G, Reyes-Del Valle J, McChesney MB, Cattaneo R. Measles virus  
447 selectively blind to signaling lymphocytic activation molecule (SLAM; CD150) is attenuated and  
448 induces strong adaptive immune responses in rhesus monkeys. J Virol. 2010;84(7):3413-20.
- 449 7. Leonard VH, Sinn PL, Hodge G, Miest T, Devaux P, Oezguen N, et al. Measles virus blind to  
450 its epithelial cell receptor remains virulent in rhesus monkeys but cannot cross the airway epithelium  
451 and is not shed. J Clin Invest. 2008;118(7):2448-58.
- 452 8. Navaratnarajah CK, Generous AR, Yousaf I, Cattaneo R. Receptor-mediated cell entry of  
453 paramyxoviruses: Mechanisms, and consequences for tropism and pathogenesis. J Biol Chem.  
454 2020;295(9):2771-86.
- 455 9. Tatsuo H, Ono N, Tanaka K, Yanagi Y. SLAM (CDw150) is a cellular receptor for measles  
456 virus. Nature. 2000;406(6798):893-7.
- 457 10. Ferreira CS, Frenzke M, Leonard VH, Welstead GG, Richardson CD, Cattaneo R. Measles  
458 virus infection of alveolar macrophages and dendritic cells precedes spread to lymphatic organs in  
459 transgenic mice expressing human signaling lymphocytic activation molecule (SLAM, CD150). J Virol.  
460 2010;84(6):3033-42.
- 461 11. Lemon K, de Vries RD, Mesman AW, McQuaid S, van Amerongen G, Yuksel S, et al. Early  
462 target cells of measles virus after aerosol infection of non-human primates. PLoS Pathog.  
463 2011;7(1):e1001263.
- 464 12. Muhlebach MD, Mateo M, Sinn PL, Prufer S, Uhlig KM, Leonard VH, et al. Adherens junction  
465 protein nectin-4 is the epithelial receptor for measles virus. Nature. 2011;480(7378):530-3.
- 466 13. Noyce RS, Bondre DG, Ha MN, Lin LT, Sisson G, Tsao MS, et al. Tumor cell marker PVRL4  
467 (nectin 4) is an epithelial cell receptor for measles virus. PLoS Pathog. 2011;7(8):e1002240.
- 468 14. de Swart RL, Ludlow M, de Witte L, Yanagi Y, van Amerongen G, McQuaid S, et al.  
469 Predominant infection of CD150+ lymphocytes and dendritic cells during measles virus infection of  
470 macaques. PLoS Pathog. 2007;3(11):e178.
- 471 15. de Vries RD, Mesman AW, Geijtenbeek TB, Duprex WP, de Swart RL. The pathogenesis of  
472 measles. Curr Opin Virol. 2012;2(3):248-55.
- 473 16. Laksono BM, de Vries RD, McQuaid S, Duprex WP, de Swart RL. Measles Virus Host  
474 Invasion and Pathogenesis. Viruses. 2016;8(8).
- 475 17. Mesman AW, de Vries RD, McQuaid S, Duprex WP, de Swart RL, Geijtenbeek TB. A  
476 prominent role for DC-SIGN+ dendritic cells in initiation and dissemination of measles virus infection in  
477 non-human primates. PLoS One. 2012;7(12):e49573.
- 478 18. Moss WJ, Griffin DE. Measles. Lancet. 2012;379(9811):153-64.
- 479 19. Delpout S, Sawatsky B, Wong XX, Frenzke M, Cattaneo R, von Messling V. Nectin-4  
480 Interactions Govern Measles Virus Virulence in a New Model of Pathogenesis, the Squirrel Monkey  
481 (*Saimiri sciureus*). J Virol. 2017;91(11).
- 482 20. Singh BK, Li N, Mark AC, Mateo M, Cattaneo R, Sinn PL. Cell-to-Cell Contact and Nectin-4  
483 Govern Spread of Measles Virus from Primary Human Myeloid Cells to Primary Human Airway  
484 Epithelial Cells. J Virol. 2016;90(15):6808-17.

- 485 21. Sinn PL, Williams G, Vongpunsawad S, Cattaneo R, McCray PB, Jr. Measles virus  
486 preferentially transduces the basolateral surface of well-differentiated human airway epithelia. *J Virol.*  
487 2002;76(5):2403-9.
- 488 22. Singh BK, Hornick AL, Krishnamurthy S, Locke AC, Mendoza CA, Mateo M, et al. The Nectin-  
489 4/Afadin Protein Complex and Intercellular Membrane Pores Contribute to Rapid Spread of Measles  
490 Virus in Primary Human Airway Epithelia. *J Virol.* 2015;89(14):7089-96.
- 491 23. Singh BK, Pfaller CK, Cattaneo R, Sinn PL. Measles Virus Ribonucleoprotein Complexes  
492 Rapidly Spread across Well-Differentiated Primary Human Airway Epithelial Cells along F-Actin  
493 Rings. *mBio.* 2019;10(6).
- 494 24. Franz A, Adams O, Willems R, Bonzel L, Neuhausen N, Schweizer-Krantz S, et al. Correlation  
495 of viral load of respiratory pathogens and co-infections with disease severity in children hospitalized  
496 for lower respiratory tract infection. *J Clin Virol.* 2010;48(4):239-45.
- 497 25. Ludlow M, de Vries RD, Lemon K, McQuaid S, Millar E, van Amerongen G, et al. Infection of  
498 lymphoid tissues in the macaque upper respiratory tract contributes to the emergence of transmissible  
499 measles virus. *J Gen Virol.* 2013;94(Pt 9):1933-44.
- 500 26. Bischoff WE, McNall RJ, Blevins MW, Turner J, Lopareva EN, Rota PA, et al. Detection of  
501 Measles Virus RNA in Air and Surface Specimens in a Hospital Setting. *J Infect Dis.* 2016;213(4):600-  
502 3.
- 503 27. Satir P. Structural basis of ciliary movement. *Environ Health Perspect.* 1980;35:77-82.
- 504 28. Villenave R, Thavagnanam S, Sarlang S, Parker J, Douglas I, Skibinski G, et al. In vitro  
505 modeling of respiratory syncytial virus infection of pediatric bronchial epithelium, the primary target of  
506 infection in vivo. *Proc Natl Acad Sci U S A.* 2012;109(13):5040-5.
- 507 29. Huang ZX, Tian HY, Hu ZF, Zhou YB, Zhao J, Yao KT. GenCLiP: a software program for  
508 clustering gene lists by literature profiling and constructing gene co-occurrence networks related to  
509 custom keywords. *BMC Bioinformatics.* 2008;9:308.
- 510 30. Wang JH, Zhao LF, Lin P, Su XR, Chen SJ, Huang LQ, et al. GenCLiP 2.0: a web server for  
511 functional clustering of genes and construction of molecular networks based on free terms.  
512 *Bioinformatics.* 2014;30(17):2534-6.
- 513 31. Blau DM, Compans RW. Entry and release of measles virus are polarized in epithelial cells.  
514 *Virology.* 1995;210(1):91-9.
- 515 32. Blau DM, Compans RW. Adaptation of measles virus to polarized epithelial cells: alterations in  
516 virus entry and release. *Virology.* 1997;231(2):281-9.
- 517 33. Maisner A, Klenk H, Herrler G. Polarized budding of measles virus is not determined by viral  
518 surface glycoproteins. *J Virol.* 1998;72(6):5276-8.
- 519 34. Naim HY, Ehler E, Billeter MA. Measles virus matrix protein specifies apical virus release and  
520 glycoprotein sorting in epithelial cells. *EMBO J.* 2000;19(14):3576-85.
- 521 35. Lightwood R, Nolan R. Epithelial giant cells in measles as an acid in diagnosis. *J Pediatr.*  
522 1970;77(1):59-64.
- 523 36. Scheifele DW, Forbes CE. Prolonged giant cell excretion in severe African measles.  
524 *Pediatrics.* 1972;50(6):867-73.
- 525 37. Hope K, Boyd R, Conaty S, Maywood P. Measles transmission in health care waiting rooms:  
526 implications for public health response. *Western Pac Surveill Response J.* 2012;3(4):33-8.
- 527 38. Remington PL, Hall WN, Davis IH, Herald A, Gunn RA. Airborne transmission of measles in a  
528 physician's office. *JAMA.* 1985;253(11):1574-7.
- 529 39. Robinson CM, Jesudhasan PR, Pfeiffer JK. Bacterial lipopolysaccharide binding enhances  
530 virion stability and promotes environmental fitness of an enteric virus. *Cell Host Microbe.*  
531 2014;15(1):36-46.
- 532 40. Sajjan DB, Hinchigeri SB. Structural Organization of Baculovirus Occlusion Bodies and  
533 Protective Role of Multilayered Polyhedron Envelope Protein. *Food Environ Virol.* 2016;8(1):86-100.
- 534 41. Santiana M, Ghosh S, Ho BA, Rajasekaran V, Du WL, Mutsafi Y, et al. Vesicle-Cloaked Virus  
535 Clusters Are Optimal Units for Inter-organismal Viral Transmission. *Cell Host Microbe.*  
536 2018;24(2):208-20 e8.

- 537 42. Hirai-Yuki A, Hensley L, Whitmire JK, Lemon SM. Biliary Secretion of Quasi-Enveloped  
538 Human Hepatitis A Virus. *mBio*. 2016;7(6).
- 539 43. Cattaneo R, Donohue RC, Generous AR, Navaratnarajah CK, Pfaller CK. Stronger together:  
540 Multi-genome transmission of measles virus. *Virus Res*. 2019;265:74-9.
- 541 44. Donohue RC, Pfaller CK, Cattaneo R. Cyclical adaptation of measles virus quasispecies to  
542 epithelial and lymphocytic cells: To V, or not to V. *PLoS Pathog*. 2019;15(2):e1007605.
- 543 45. Atkin-Smith GK, Duan M, Chen W, Poon IKH. The induction and consequences of Influenza A  
544 virus-induced cell death. *Cell Death Dis*. 2018;9(10):1002.
- 545 46. Villenave R, Touzelet O, Thavagnanam S, Sarlang S, Parker J, Skibinski G, et al.  
546 Cytopathogenesis of Sendai virus in well-differentiated primary pediatric bronchial epithelial cells. *J*  
547 *Viro*. 2010;84(22):11718-28.
- 548 47. Eisenhoffer GT, Loftus PD, Yoshigi M, Otsuna H, Chien CB, Morcos PA, et al. Crowding  
549 induces live cell extrusion to maintain homeostatic cell numbers in epithelia. *Nature*.  
550 2012;484(7395):546-9.
- 551 48. Gudipaty SA, Rosenblatt J. Epithelial cell extrusion: Pathways and pathologies. *Semin Cell*  
552 *Dev Biol*. 2017;67:132-40.
- 553 49. Liesman RM, Buchholz UJ, Luongo CL, Yang L, Proia AD, DeVincenzo JP, et al. RSV-  
554 encoded NS2 promotes epithelial cell shedding and distal airway obstruction. *J Clin Invest*.  
555 2014;124(5):2219-33.
- 556 50. Marshall TW, Lloyd IE, Delalande JM, Nathke I, Rosenblatt J. The tumor suppressor  
557 adenomatous polyposis coli controls the direction in which a cell extrudes from an epithelium. *Mol Biol*  
558 *Cell*. 2011;22(21):3962-70.
- 559 51. Karp PH, Moninger TO, Weber SP, Nesselhauf TS, Launspach JL, Zabner J, et al. An in vitro  
560 model of differentiated human airway epithelia. Methods for establishing primary cultures. *Methods*  
561 *Mol Biol*. 2002;188:115-37.
- 562 52. Ono N, Tatsuo H, Hidaka Y, Aoki T, Minagawa H, Yanagi Y. Measles viruses on throat swabs  
563 from measles patients use signaling lymphocytic activation molecule (CDw150) but not CD46 as a  
564 cellular receptor. *J Virol*. 2001;75(9):4399-401.
- 565 53. Stuart T, Butler A, Hoffman P, Hafemeister C, Papalexi E, Mauck WM, 3rd, et al.  
566 Comprehensive Integration of Single-Cell Data. *Cell*. 2019;177(7):1888-902 e21.
- 567 54. Team RC. R: A language and environment for statistical computing Vienna, Austria: R  
568 Foundation for Statistical Computing; 2020. Available from: <https://www.R-project.org/>.
- 569 55. Toth AM, Devaux P, Cattaneo R, Samuel CE. Protein kinase PKR mediates the apoptosis  
570 induction and growth restriction phenotypes of C protein-deficient measles virus. *J Virol*.  
571 2009;83(2):961-8.
- 572
- 573

574 **FIGURE LEGENDS**

575

576 **Fig 1. Infectious centers dislodge from HAE as units.** (A) Live fluorescence microscopy of HAE  
577 infected with MeV-GFP (MOI = 1) over a time course of 21 days. All images are from the same field of  
578 view and are representative of 3 human donors. Colored arrows indicate examples of unique  
579 infectious centers that disappear during the time course. Scale bars = 500  $\mu\text{m}$ . (B and C) *En face* and  
580 vertical confocal images of infectious centers at 3 days post-infection and 21 days post-infection,  
581 respectively. Z-stack images from B and C were used to create 3D models (D and E) respectively.  
582 Green, MeV-GFP; blue, DAPI.

583

584 **Fig 2. Sloughed infectious centers contain MeV.** (A) Basolateral media, cell lysates, and apical  
585 washes were collected from HAE at 3, 7, 10, 14, 18, and 21 days post-infection (MOI = 1). Apical  
586 washes were gently centrifuged to separate cell-free virus from cell-associated virus. (B) TCID<sub>50</sub> titers  
587 were performed on all four sample types at each timepoint (n = 3 human donors). Means  $\pm$  standard  
588 deviation are shown. \* $p < 0.05$ , cell-free vs. cell-associated. (C) Apical washes were mounted on  
589 coverslips and sloughed infectious centers were counterstained with DAPI (blue) and phalloidin (red).  
590 Images were collected with confocal microscopy and are representative of 3 human donors.

591

592 **Fig 3. Cells of sloughed infectious centers are not apoptotic.** (A) Apical washes were collected  
593 from MeV-infected HAE (14 days post-infection; MOI = 1), fixed, and immunostained for cleaved  
594 caspase-3 (CASP3). (B) HAE were treated with staurosporine (100  $\mu\text{M}$ , 5 hrs) as a positive control to  
595 induce apoptosis, fixed, and immunostained for CASP3 (red), DAPI (blue), and phalloidin (gray).  
596 Scale bar = 50  $\mu\text{m}$ . (C) Western blot was performed on lysates from mock or MeV-infected HAE (n = 3;  
597 MOI = 1). Blots were probed for cleaved CASP3 and MeV N-protein.  $\alpha$ -tubulin was used as a loading  
598 control protein. Staurosporine (stauro) treatment was used as a positive control. (D) Caspase-3  
599 activity was assayed following mock, staurosporine (100  $\mu\text{M}$ , 5 hrs), MeV (MOI = 1), or respiratory

600 syncytial virus (RSV, MOI = 1) treatment of HAE (14 days post-infection; n = 3 human donors with 2  
601 technical replicates). Fluorescence was measured in arbitrary units (AU) via plate reader. \*\*\*\*p <  
602 0.0001; \*p < 0.05.

603

604 **Fig 4. Sloughed infectious centers spread MeV infection.** (A) The experimental design is shown  
605 schematically. Monocytes were isolated from human donor blood (n = 2 donors) and treated with  
606 selected cytokines to induce differentiation into M2 MDMs. Cell-free and cell-associated virus from  
607 MeV-infected HAE (14 days post-infection; n = 3) were applied to the macrophages. (B) Spread was  
608 evaluated via inverted fluorescent microscopy two days after transfer to macrophages (scale bars =  
609 50  $\mu$ m; green arrow, cell-associated virus; red arrow, infected macrophages). Images are  
610 representative of 3 independent experiments. (C) The cell-associated and cell-free virus was titered  
611 concurrently via TCID<sub>50</sub>. Counts of infected macrophages were adjusted for titer differences. A  
612 Student's t-test indicated no statistical significance. MDM, monocyte-derived macrophages; BF,  
613 brightfield.

614

615 **Fig 5. Defining the transcriptome of MeV infected HAE with scRNA-seq.** (A) The experimental  
616 design is shown schematically. MeV or mock-infected HAE (n = 10 human donors; MOI = 5) were  
617 sorted via FACS at day 3, 7, or 14 post-infection and gated for GFP expression. GFP+ and GFP- cells  
618 were collected from MeV-infected HAE. Control cells were sorted via FACS from mock infected  
619 cultures (referred to as Mock). Cells from all 10 donors were pooled within their treatment type and  
620 prepared for scRNA-seq (10x Genomics). In total, 30,743 cells were sequenced. We projected these  
621 cells in a Uniform Manifold Approximation and Projection for Dimension Reduction (UMAP) and color-  
622 coded them by their treatment group (B) and cell type (C). (D) The percentage of each cell type within  
623 each treatment group is shown.

624

625 **Fig 6. Candidate gene expression pathways involved in infectious center sloughing.** Pathway  
626 analysis of differentially expressed genes for (A) GFP+ and (B) GFP- cells is shown. Red bars



627 indicate pathways associated with upregulated genes and blue bars indicate pathways associated  
628 with downregulated genes. Gene expression heatmaps for genes associated with (C) apoptosis or (D)  
629 cell proliferation is shown.

630

631 **Fig 7. Basal cell proliferation is stimulated underneath infectious centers.** (A) Transepithelial  
632 electrical resistance (TER) of MeV-infected HAE (MOI = 1; n = 3) over 21 days of infection. Measured  
633 by an epithelial ohm meter with a chopstick electrode (EVOM<sup>2</sup>; World Precision Instruments) and  
634 shown as a percentage of baseline. EdU immunostaining of MeV-infected HAE at (B) 3 days post-  
635 infection and (C) 14 days post-infection. EdU was applied for 16 hours at 10  $\mu$ M before fixation and  
636 staining. Images are representative of 4 independent experiments and 9 human donors. Red, EdU;  
637 green, MeV-GFP; blue, DAPI; scale bars = 50  $\mu$ m. (D) The number of infectious centers and EdU+  
638 cells associated with each infectious center were counted. The key shows the number of EdU+ cells  
639 associated with an infectious center. The Y-axis signifies the percentage of infectious centers with that  
640 number of EdU+ cells for each timepoint. (E) The percentage of cells identified by scRNA-seq over  
641 the time course. (F) A schematic describing the quantification of background proliferation is shown.  
642 For each HAE culture (mock or MeV-infected), 5 fields of view were imaged at 20x, identified as blue  
643 boxes. All EdU+ cells that fell within the field of view were counted unless they were associated with  
644 an infectious center, as represented by the counts in the corner of each box. (G) Quantification was  
645 performed on HAE infected for 3, 7, 14, or 21 days (MOI = 1; n = 6 human donors as indicated by a  
646 unique shape).

647

648

**Fig 1**

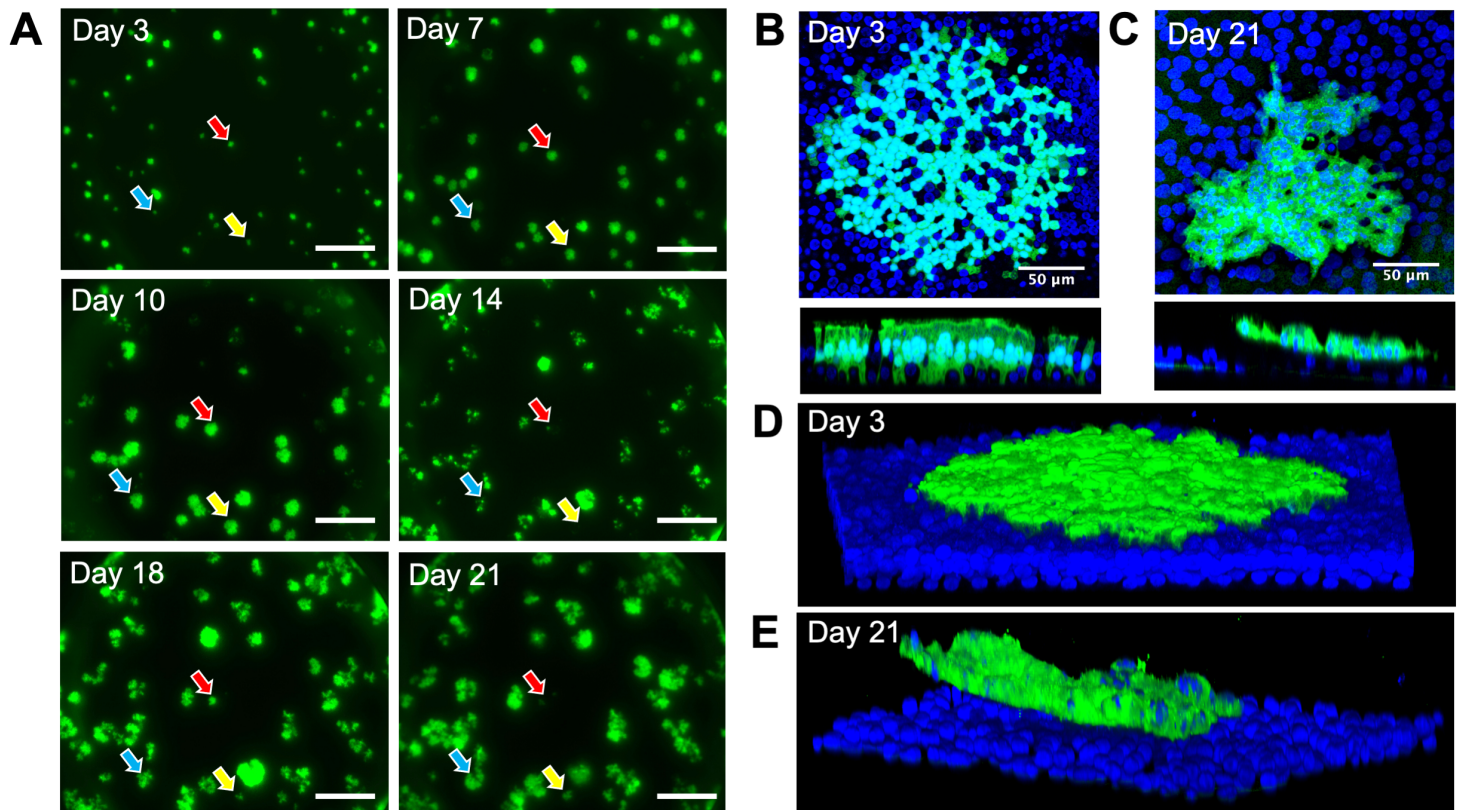

**Fig 1. Infectious centers dislodge from HAE as units.** (A) Live fluorescence microscopy of HAE infected with MeV-GFP (MOI = 1) over a time course of 21 days. All images are from the same field of view and are representative of 3 human donors. Colored arrows indicate examples of unique infectious centers that disappear during the time course. Scale bars = 500 μm. (B and C) *En face* and vertical confocal images of infectious centers at 3 days post-infection and 21 days post-infection, respectively. Z-stack images from B and C were used to create 3D models (D and E) respectively. Green, MeV-GFP; blue, DAPI.

**Fig 2**

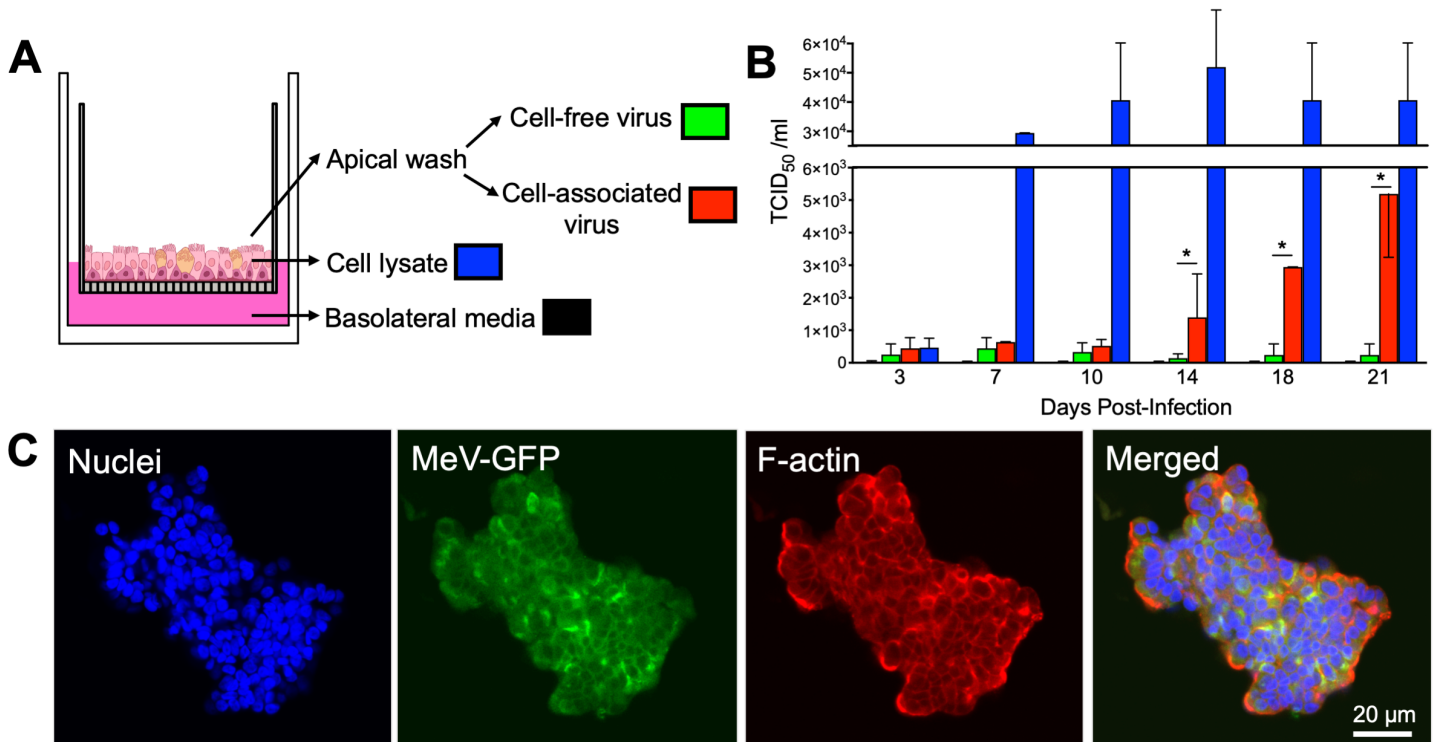

**Fig 2. Sloughed infectious centers contain MeV.** (A) Basolateral media, cell lysates, and apical washes were collected from HAE at 3, 7, 10, 14, 18, and 21 days post-infection (MOI = 1). Apical washes were gently centrifuged to separate cell-free virus from cell-associated virus. (B) TCID<sub>50</sub> titers were performed on all four sample types at each timepoint (n = 3 human donors). Means ± standard deviation are shown. \*p<0.05, cell-free vs. cell-associated. (C) Apical washes were mounted on coverslips and sloughed infectious centers were counterstained with DAPI (blue) and phalloidin (red). Images were collected with confocal microscopy and are representative of 3 human donors.

**Fig 3**

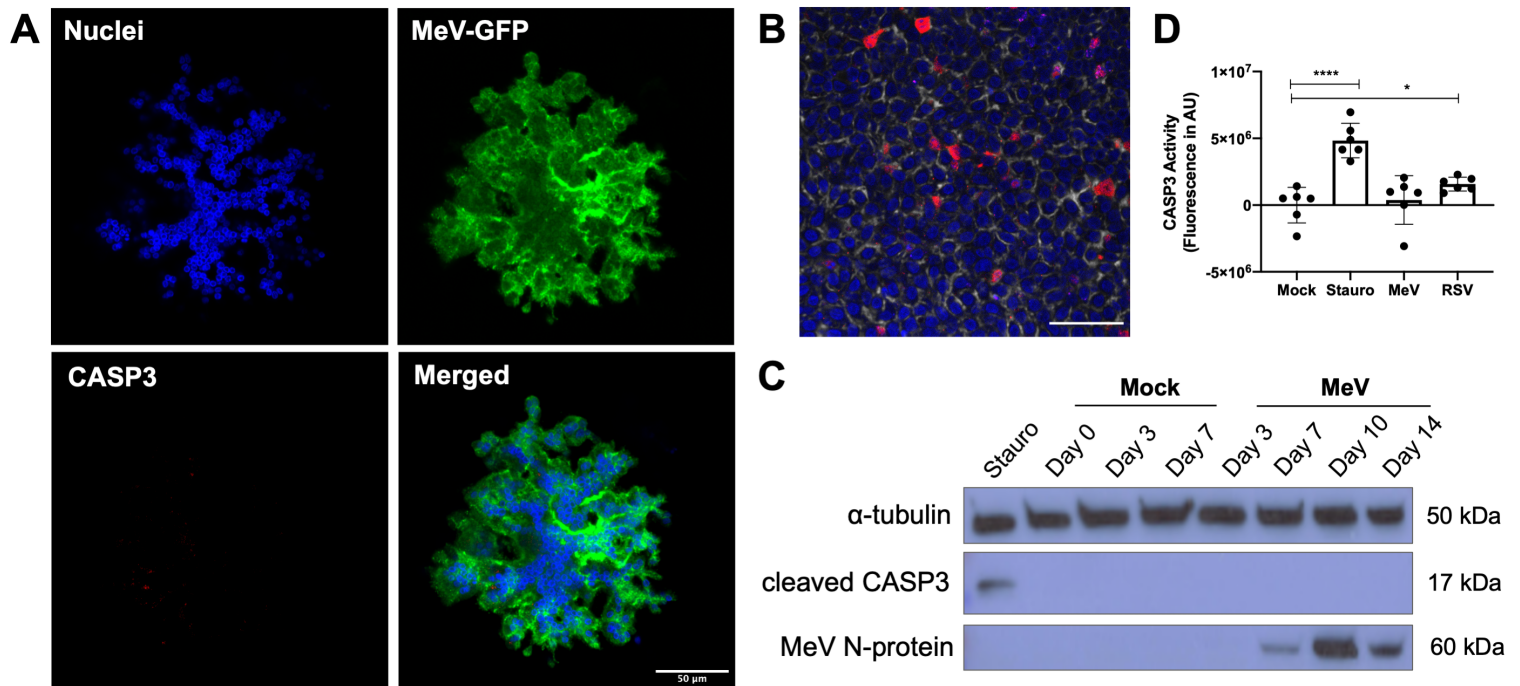

**Fig 3. Cells of sloughed infectious centers are not apoptotic.** (A) Apical washes were collected from MeV-infected HAE (14 days post-infection; MOI = 1), fixed, and immunostained for cleaved caspase-3 (CASP3). (B) HAE were treated with staurosporine (100  $\mu$ M, 5 hrs) as a positive control to induce apoptosis, fixed, and immunostained for CASP3 (red), DAPI (blue), and phalloidin (gray). Scale bar = 50 $\mu$ m. (C) Western blot was performed on lysates from mock or MeV-infected HAE (n = 3; MOI = 1). Blots were probed for cleaved CASP3 and MeV N-protein.  $\alpha$ -tubulin was used as a loading control protein. Staurosporine (stauro) treatment was used as a positive control. (D) Caspase-3 activity was assayed following mock, staurosporine (100  $\mu$ M, 5 hrs), MeV (MOI = 1), or respiratory syncytial virus (RSV, MOI = 1) treatment of HAE (14 days post-infection; n = 3 human donors with 2 technical replicates). Fluorescence was measured in arbitrary units (AU) via plate reader. \*\*\*\*p < 0.0001; \*p < 0.05.

## Fig 4

### A

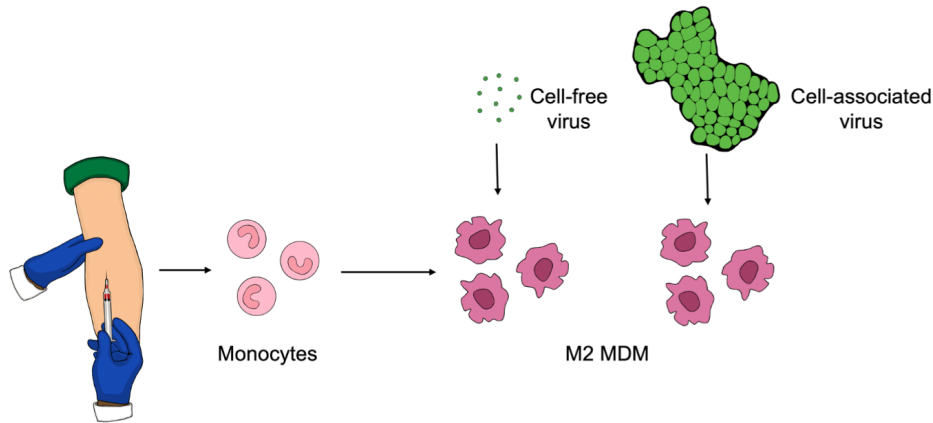

### B

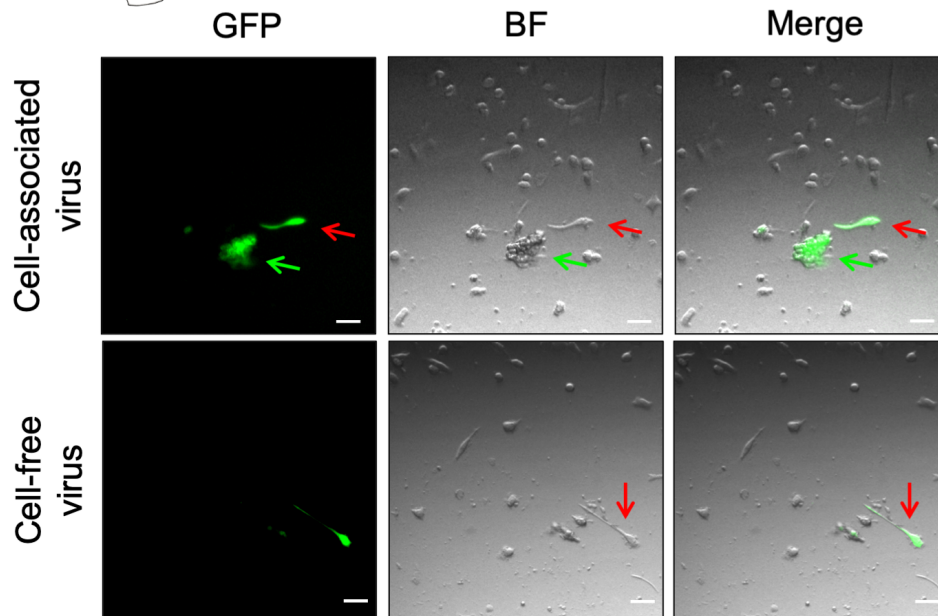

### C

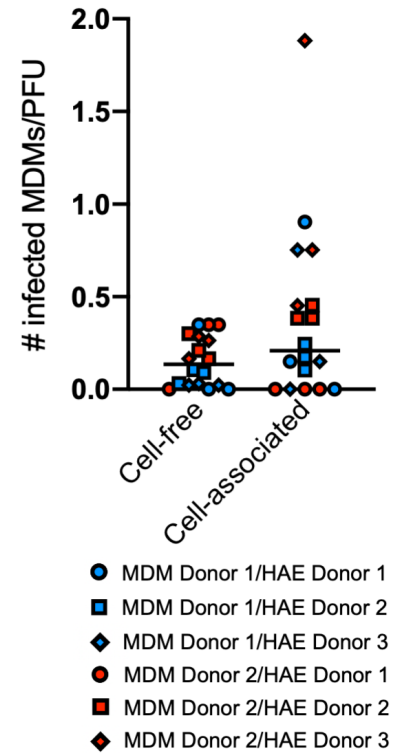

**Fig 4. Sloughed infectious centers spread MeV infection.** (A) The experimental design is shown schematically. Monocytes were isolated from human donor blood ( $n = 2$  donors) and treated with selected cytokines to induce differentiation into M2 MDMs. Cell-free and cell-associated virus from MeV-infected HAE (14 days post-infection;  $n = 3$ ) were applied to the macrophages. (B) Spread was evaluated via inverted fluorescent microscopy two days after transfer to macrophages (scale bars = 50  $\mu\text{m}$ ; green arrow, cell-associated virus; red arrow, infected macrophages). Images are representative of 3 independent experiments. (C) The cell-associated and cell-free virus was titered concurrently via  $\text{TCID}_{50}$ . Counts of infected macrophages were adjusted for titer differences. A Student's t-test indicated no statistical significance. MDM, monocyte-derived macrophages; BF, brightfield.

**Fig 5**

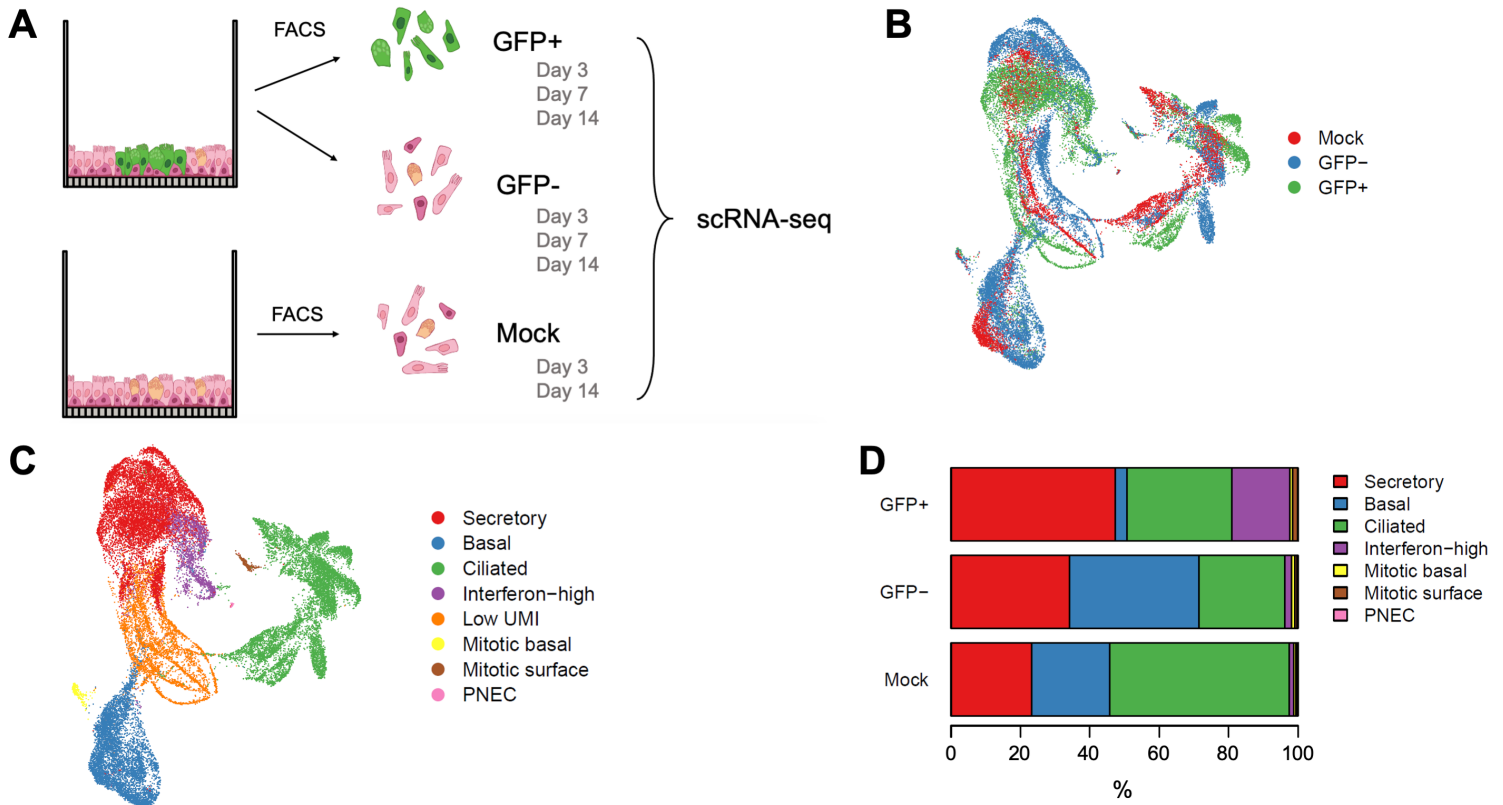

**Fig 5. Defining the transcriptome of MeV infected HAE with scRNA-seq.** (A) The experimental design is shown schematically. MeV or mock-infected HAE (n = 10 human donors; MOI = 5) were sorted via FACS at day 3, 7, or 14 post-infection and gated for GFP expression. GFP+ and GFP- cells were collected from MeV-infected HAE. Control cells were sorted via FACS from mock infected cultures (referred to as Mock). Cells from all 10 donors were pooled within their treatment type and prepared for scRNA-seq (10x Genomics). In total, 30,743 cells were sequenced. We projected these cells in a Uniform Manifold Approximation and Projection for Dimension Reduction (UMAP) and color-coded them by their treatment group (B) and cell type (C). (D) The percentage of each cell type within each treatment group is shown.

**Fig 6**

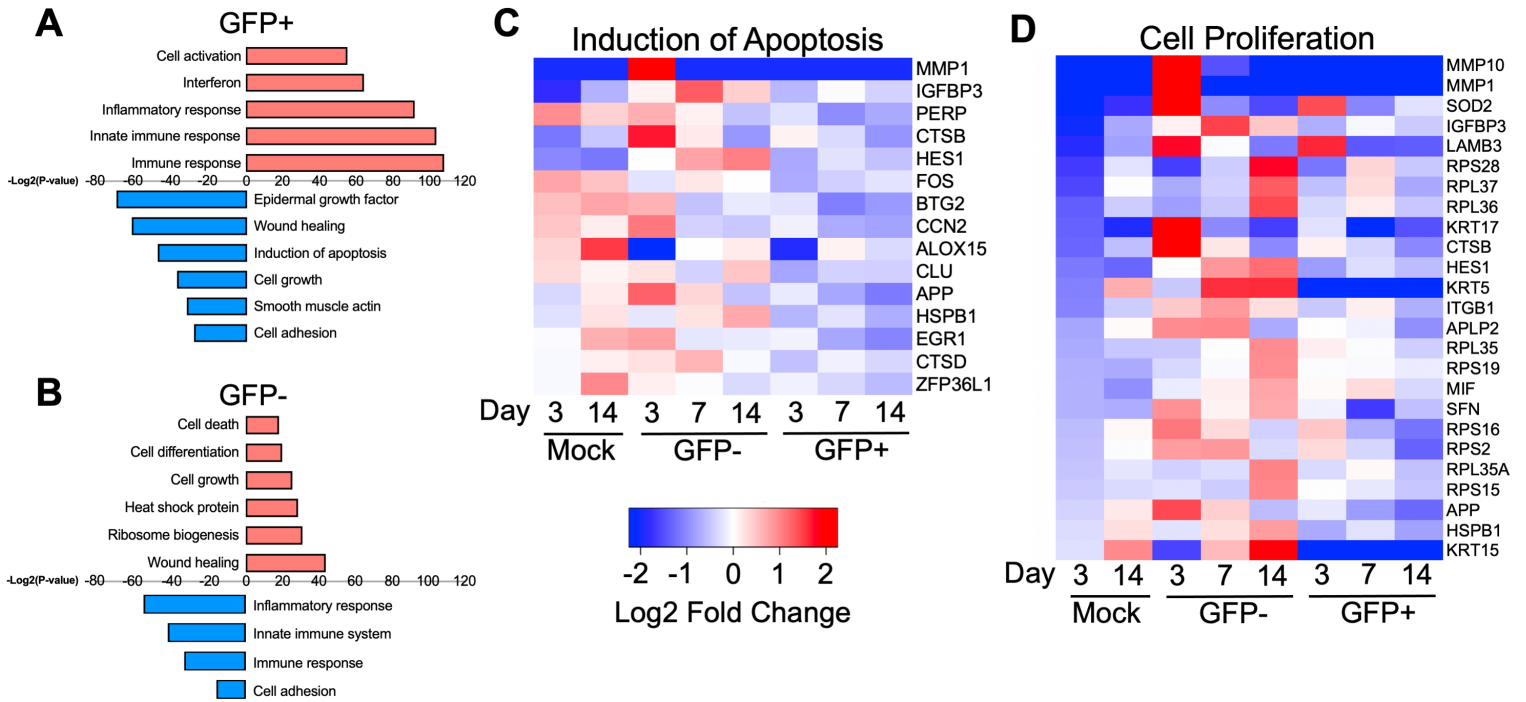

**Fig 6. Candidate gene expression pathways involved in infectious center sloughing.** Pathway analysis of differentially expressed genes for (A) GFP+ and (B) GFP- cells is shown. Red bars indicate pathways associated with upregulated genes and blue bars indicate pathways associated with downregulated genes. Gene expression heatmaps for genes associated with (C) apoptosis or (D) cell proliferation is shown.

**Fig 7**

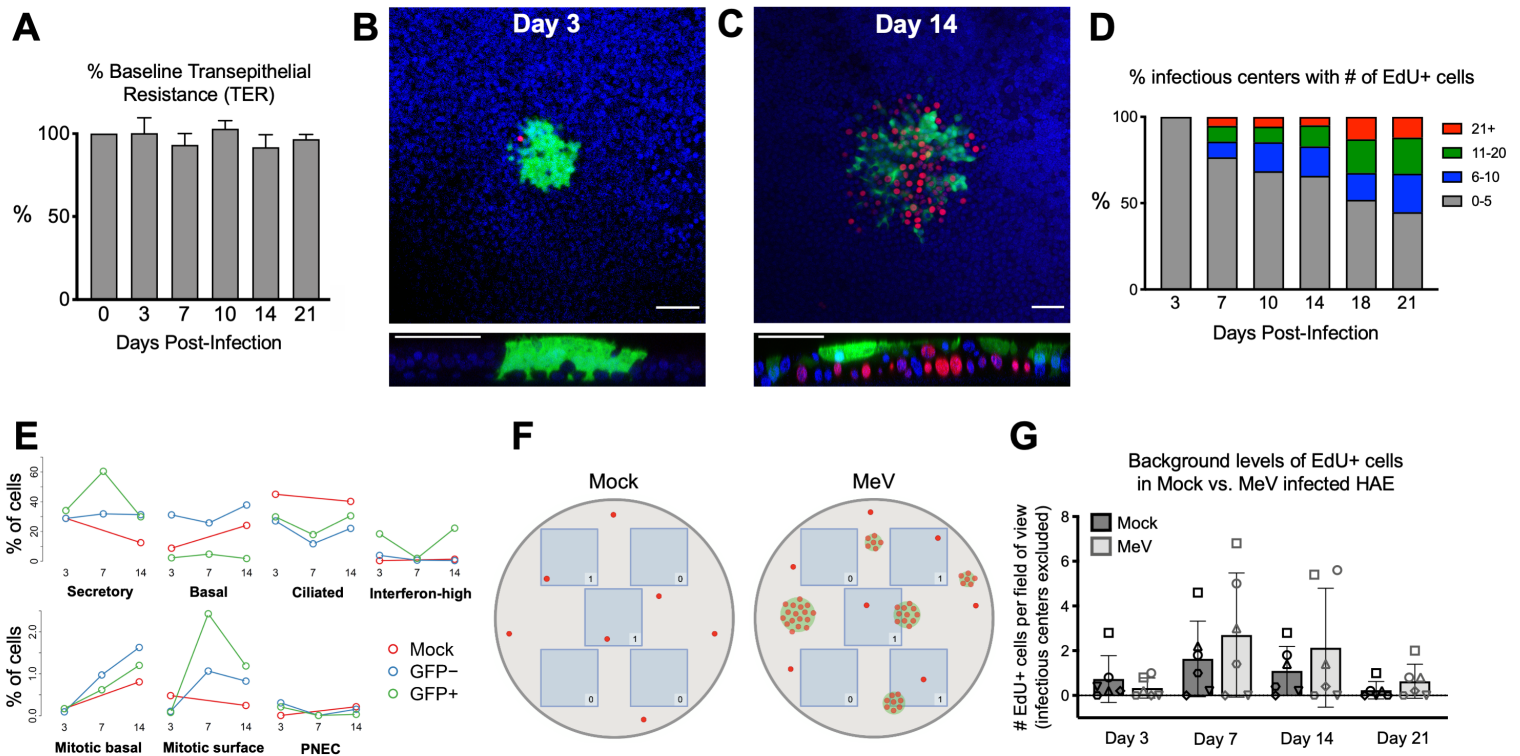

**Fig 7. Basal cell proliferation is stimulated underneath infectious centers.** (A) Transepithelial electrical resistance (TER) of MeV-infected HAE (MOI = 1; n = 3) over 21 days of infection. Measured by an epithelial ohm meter with a chopstick electrode (EVOM<sup>2</sup>; World Precision Instruments) and shown as a percentage of baseline. EdU immunostaining of MeV-infected HAE at (B) 3 days post-infection and (C) 14 days post-infection. EdU was applied for 16 hours at 10  $\mu$ M before fixation and staining. Images are representative of 4 independent experiments and 9 human donors. Red, EdU; green, MeV-GFP; blue, DAPI; scale bars = 50  $\mu$ m. (D) The number of infectious centers and EdU+ cells associated with each infectious center were counted. The key shows the number of EdU+ cells associated with an infectious center. The Y-axis signifies the percentage of infectious centers with that number of EdU+ cells for each timepoint. (E) The percentage of cells identified by scRNA-seq over the time course. (F) A schematic describing the quantification of background proliferation is shown. For each HAE culture (mock or MeV-infected), 5 fields of view were imaged at 20x, identified as blue boxes. All EdU+ cells that fell within the field of view were counted unless they were associated with an infectious center, as represented by the counts in the corner of each box. (G) Quantification was performed on HAE infected for 3, 7, 14, or 21 days (MOI = 1; n = 6 human donors as indicated by a unique shape).
